# Supplementary material
Source: Springer Nature journal article supplement (https://www.springermedizin.de/resource/supplementary/12880_2006_37_MOESM3_ESM.pdf/9450418)

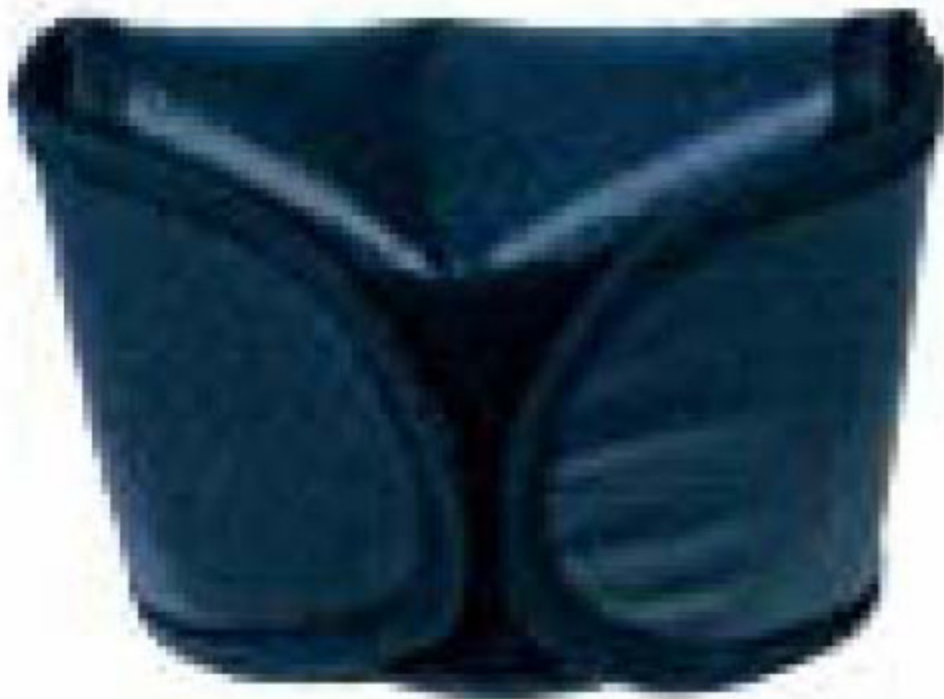

15 cm

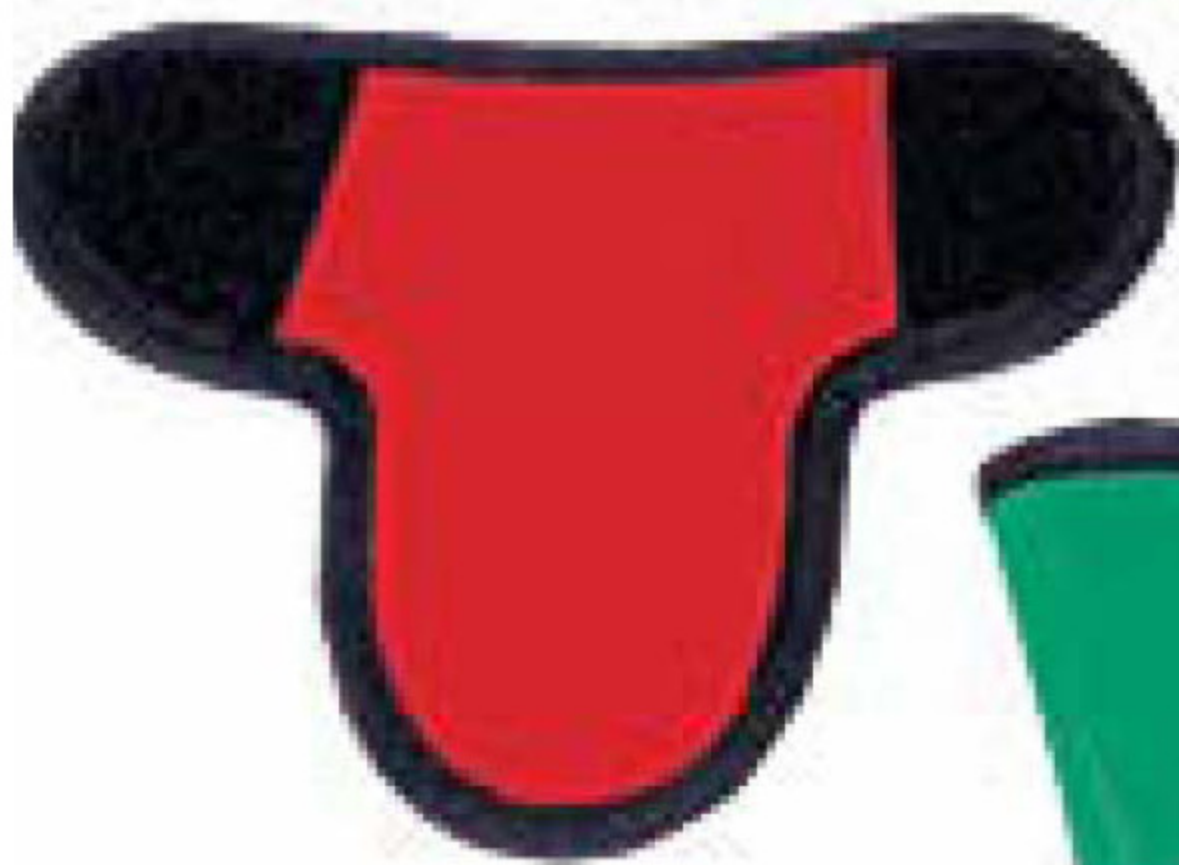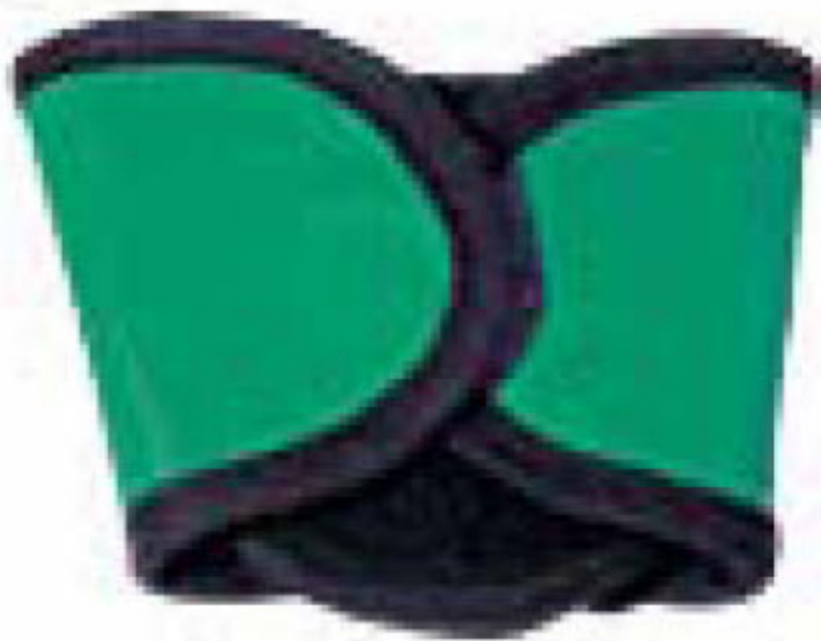

Supplement: MOESM3 [file 9450418]
